# Supplementary material for: Spectrally tunable and thermally stable near-infrared luminescence in Na3Sc2(PO4)3:Cr3+ phosphors by Ga3+ co-doping for light-emitting diodes
Source: Royal Society of Chemistry journal article supplement (doi:10.1039/d1tc05289f), 2021-12-07
Supplement: d1tc05289f1.pdf [file d1tc05289f1.pdf]

## Supporting Information

### **Spectrally tunable and thermally stable near-infrared luminescence in $\text{Na}_3\text{Sc}_2(\text{PO}_4)_3:\text{Cr}^{3+}$ phosphor by $\text{Ga}^{3+}$ co-doping for light-emitting diodes**

Shihai Miao,<sup>a</sup> Yanjie Liang,<sup>\*a</sup> Yan Zhang,<sup>a</sup> Dongxun Chen,<sup>a</sup> Shao Yan,<sup>a</sup> Jingwei Liu,<sup>a</sup>

Xiao-Jun Wang<sup>\*b</sup>

<sup>a</sup>*Key Laboratory for Liquid-Solid Structure Evolution and Processing of Materials, Ministry of Education, Shandong University, Jinan 250061, China*

<sup>b</sup>*Department of Physics, Georgia Southern University, Statesboro, GA, 30460, USA*

\*Corresponding author: YJ Liang, XJ Wang

E-mail: [yanjie.liang@sdu.edu.cn](mailto:yanjie.liang@sdu.edu.cn), [xwang@georgiasouthern.edu](mailto:xwang@georgiasouthern.edu)

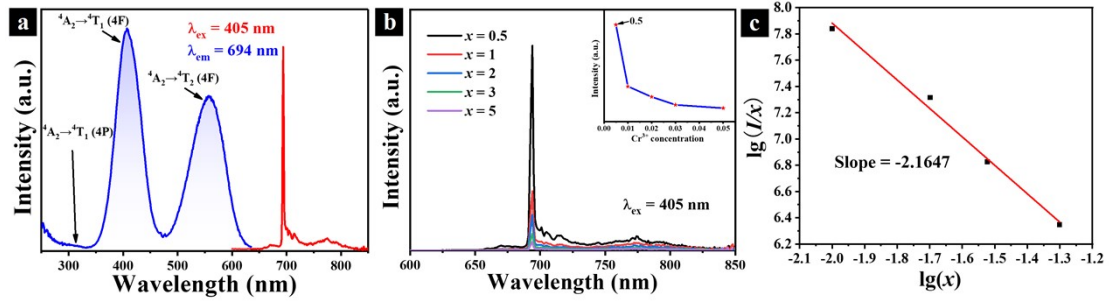

**Fig. S1** (a) The luminescence spectra of  $\text{Na}_3\text{Sc}_{1.995}(\text{PO}_4)_3:0.5\%\text{Cr}^{3+}$  at room temperature, PL excitation (blue curve,  $\lambda_{\text{em}} = 694 \text{ nm}$ ), and PL emission (red curve,  $\lambda_{\text{ex}} = 405 \text{ nm}$ ). (b) PL spectra of  $\text{Na}_3\text{Sc}_2(\text{PO}_4)_3:x\%\text{Cr}^{3+}$  ( $x = 0.5, 1, 2, 3, 5$ ). Inset: the integral PL intensity as a function of  $\text{Cr}^{3+}$  concentration. (c) The relationships of  $\lg(I/x)$  versus  $\lg(x)$ .

The emission intensity ( $I$ ) can be calculated based on the following Eq.:

$$\frac{I}{x} = K \left[ 1 + \beta(x)^{\theta/3} \right]^{-1} \quad (1)$$

Where  $I$  is the emission intensity,  $x$  is the concentration of the activator ions above the quenching concentration,  $\beta$  and  $K$  are constant for the same excitation conditions, and  $\theta$  is the function of multipole-multipole interaction for 6 (dipole-dipole), 8 (dipole-quadrupole) or 10 (quadrupole-quadrupole). To get a correct  $\theta$  value for the two emission centers, the dependence of  $\lg(I/x)$  on  $\lg(x)$  is plotted, and it yield a straight line with a slope equal to  $-\theta/3$ .

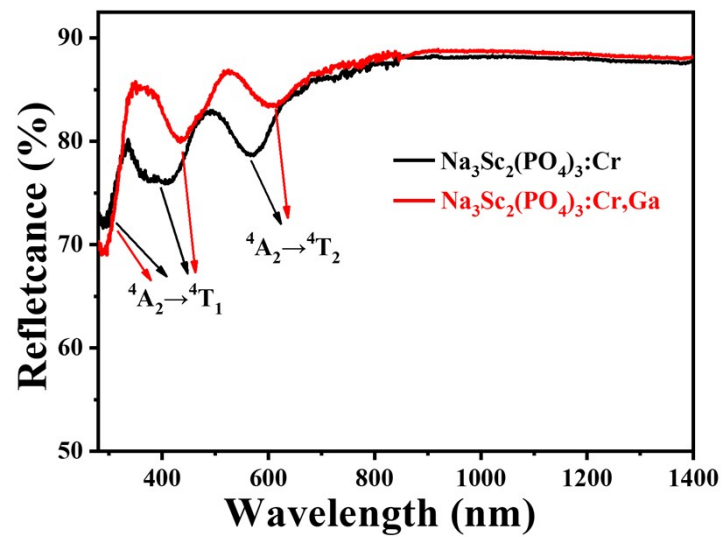

**Fig. S2** The diffuse reflectance spectra of  $\text{Na}_3\text{Sc}_{1.995}(\text{PO}_4)_3:0.5\%\text{Cr}^{3+}$  and  $\text{Na}_3\text{Sc}_{1.936}(\text{PO}_4)_3:0.5\%\text{Cr}^{3+},6\%\text{Ga}^{3+}$  phosphors.

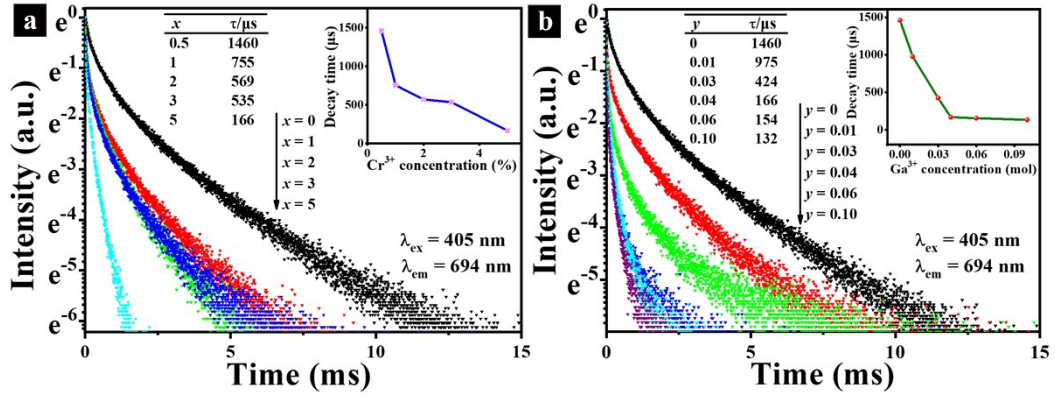

**Fig. S3** (a) Decay curves of Cr<sup>3+</sup> emission in Na<sub>3</sub>Sc<sub>2</sub>(PO<sub>4</sub>)<sub>3</sub>:x%Cr<sup>3+</sup> phosphors under excitation at 405 nm, monitored at 694 nm. Inset: dependence of the fluorescence lifetime of the Cr<sup>3+</sup> in Na<sub>3</sub>Sc<sub>2</sub>(PO<sub>4</sub>)<sub>3</sub>:x%Cr<sup>3+</sup> samples. (b) Decay curves of Cr<sup>3+</sup> emission in Na<sub>3</sub>Sc<sub>1.995</sub>(PO<sub>4</sub>)<sub>3</sub>:0.5%Cr<sup>3+</sup>,yGa<sup>3+</sup> phosphors under excitation at 405 nm, monitored at 694 nm. Inset is the dependence of the fluorescence lifetime.

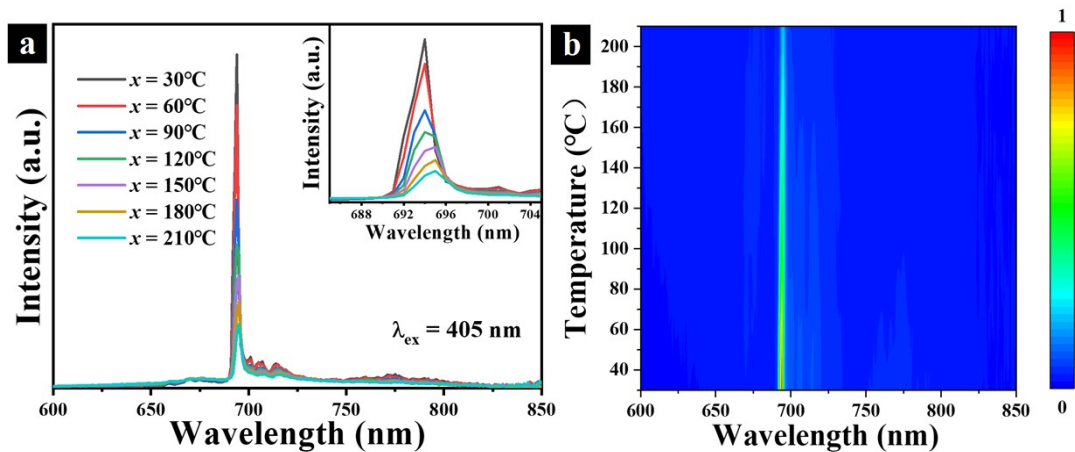

**Fig. S4** (a) The temperature-dependent emission spectra of  $\text{Na}_3\text{Sc}_{1.995}(\text{PO}_4)_3:0.5\%\text{Cr}^{3+}$  phosphor. Inset: magnified PL spectra for the phosphor. (b) Thermal quenching behavior of  $\text{Na}_3\text{Sc}_{1.995}(\text{PO}_4)_3:0.5\%\text{Cr}^{3+}$  phosphor.

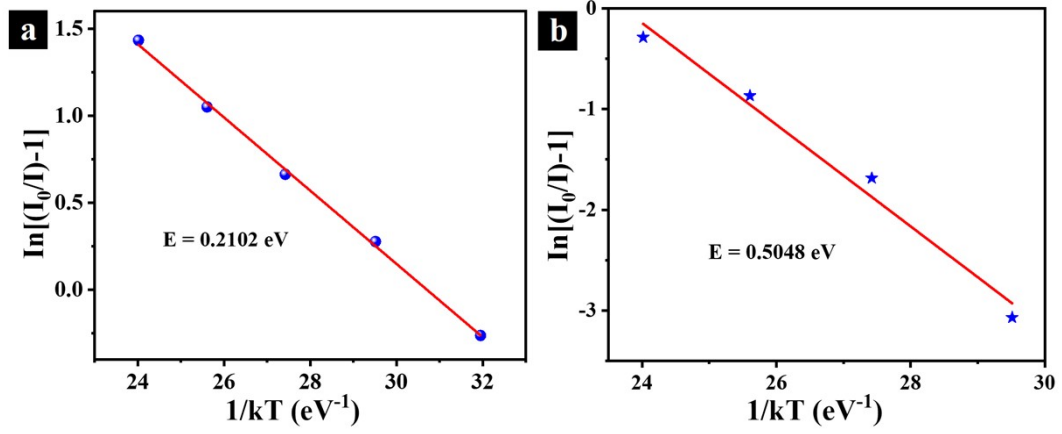

**Fig. S5** The plot of  $\ln[(I_0/I)^{-1}]$  versus  $1/kT$  for (a)  $\text{Na}_3\text{Sc}_{1.995}(\text{PO}_4)_3:0.5\%\text{Cr}^{3+}$  and (b)  $\text{Na}_3\text{Sc}_{1.935}(\text{PO}_4)_3:0.5\%\text{Cr}^{3+},6\%\text{Ga}^{3+}$ .

The activation energy  $\Delta E$  can be calculated by the following equation:

$$I_T = \frac{I_0}{1 + c \exp\left(-\frac{\Delta E}{kT}\right)} \quad (2)$$

where  $I_0$  and  $I_T$  are the initial PL intensity of the samples at room temperature and different temperatures, respectively.  $T$  is the temperature,  $c$  is a constant, and  $k$  is the Boltzmann constant ( $8.629 \times 10^{-5}$  eV/k). On the basis of Eq. 2,  $\Delta E$  values of  $\text{Na}_3\text{Sc}_{1.995}(\text{PO}_4)_3:0.5\%\text{Cr}^{3+}$  and  $\text{Na}_3\text{Sc}_{1.935}(\text{PO}_4)_3:0.5\%\text{Cr}^{3+},0.06\text{Ga}^{3+}$  samples were estimated to be 0.2102 eV and 0.5048 eV, respectively.

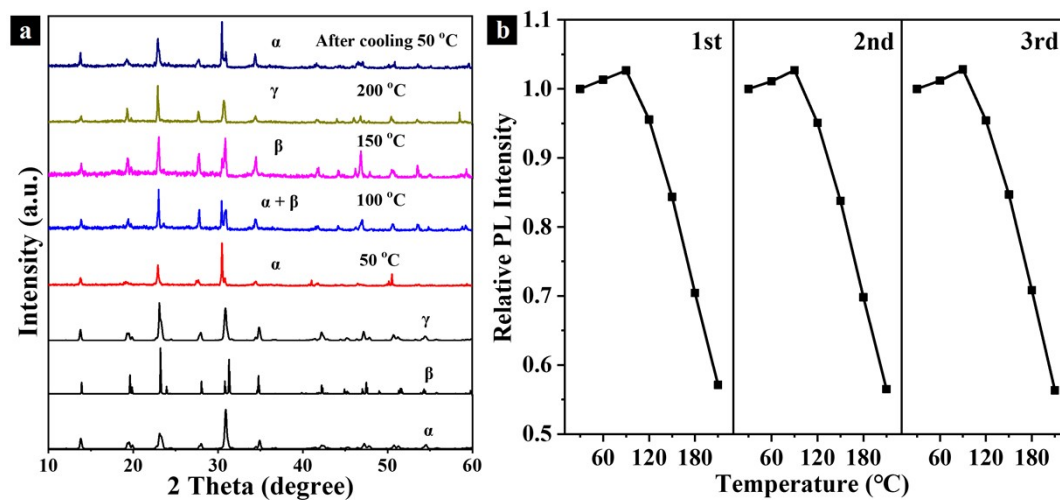

**Fig. S6** (a) Temperature-dependent XRD pattern of  $\text{Na}_3\text{Sc}_2(\text{PO}_4)_3:\text{Cr}^{3+}, \text{Ga}^{3+}$  upon heating from 50 °C to 200 °C, and subsequent cooling to 50 °C. (b) The NIR photoluminescence performance of the phosphor as a function of temperature in three continuous heating and cooling cycles.

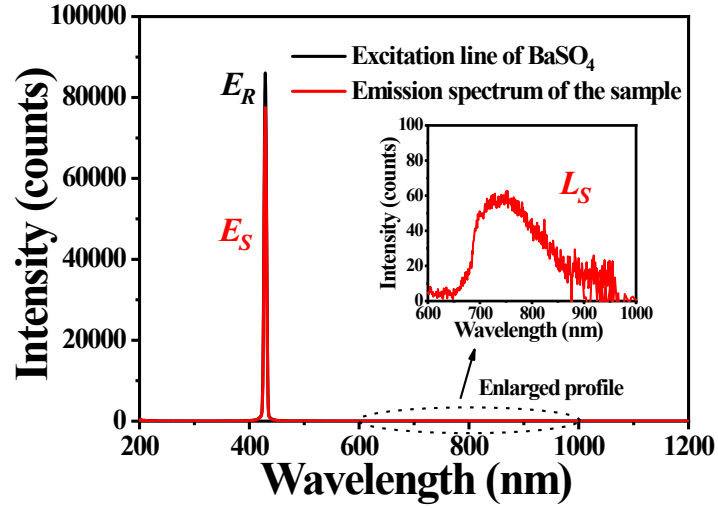

**Fig. S7** Excitation line of BaSO<sub>4</sub> and emission spectrum of the optimized Na<sub>3</sub>Sc<sub>1.935</sub>(PO<sub>4</sub>)<sub>3</sub>:0.5%Cr<sup>3+</sup>,6%Ga<sup>3+</sup> phosphor collected using an integrating sphere. The inset shows a magnification of the emission spectrum.

The internal quantum efficiency can be calculated by the following equation:

$$\eta_{QE} = \frac{\int L_S}{\int E_R - \int E_S} \quad (3)$$

where  $E_R$  is the spectrum of the excitation light without the sample in the sphere,  $E_S$  is the spectrum of the light used for exciting the sample, and  $L_S$  is the emission spectrum of the studied sample.



**Table S1** Crystal data of  $\text{Na}_3\text{Sc}_{1.995}(\text{PO}_4)_3:0.5\%\text{Cr}^{3+}$  from the Rietveld refinement.

| Formula             | $\text{Na}_3\text{Sc}_2(\text{PO}_4)_3$                                                                                                            |         |         |           |
|---------------------|----------------------------------------------------------------------------------------------------------------------------------------------------|---------|---------|-----------|
| Crystal system      | Monoclinic                                                                                                                                         |         |         |           |
| Space group         | $Cc$ (9)                                                                                                                                           |         |         |           |
| Cell parameters     | $a = 15.397403(19) \text{ \AA}$ , $b = 9.09743(13) \text{ \AA}$ , $c = 8.92197(12) \text{ \AA}$<br>Alpha = 90      Beta = 90      Gamma = 123.5242 |         |         |           |
| Cell volume         | $V = 1041.866(25) \text{ \AA}^3$                                                                                                                   |         |         |           |
| Z                   | 4                                                                                                                                                  |         |         |           |
| Reliability factors | $R_p = 6.35\%$ , $R_{wp} = 9.10\%$ and $\chi^2 = 3.946$                                                                                            |         |         |           |
| Atom                | x/a                                                                                                                                                | y/b     | z/c     | Ui/Us*100 |
| Na1                 | 0.19057                                                                                                                                            | 0.56128 | 0.16133 | 7.51      |
| Na2                 | -0.00899                                                                                                                                           | 0.24198 | 0.38908 | 2.21      |
| Na3                 | 0.32806                                                                                                                                            | 0.31874 | 0.43476 | 1.32      |
| P1                  | 0.35427                                                                                                                                            | 0.26239 | 0.1185  | 1.33      |
| P2                  | 0.63855                                                                                                                                            | 0.74757 | 0.90216 | 1.24      |
| P3                  | -0.00085                                                                                                                                           | 0.26211 | 0.05146 | 3.1       |
| Sc1                 | 0.0927                                                                                                                                             | 0.05147 | 0.24633 | 0.36      |
| Sc2                 | 0.89912                                                                                                                                            | 0.95325 | 0.75619 | 0.67      |
| O1                  | 0.16044                                                                                                                                            | 0.25889 | 0.44442 | 0.79      |
| O2                  | 0.86519                                                                                                                                            | 0.80546 | 0.57284 | -0.16     |
| O3                  | 0.42228                                                                                                                                            | 0.06125 | 0.43755 | 4.55      |
| O4                  | 0.54767                                                                                                                                            | 0.88674 | 0.52352 | 3.47      |
| O5                  | 0.25451                                                                                                                                            | 0.20212 | 0.16944 | -0.77     |
| O6                  | 0.73609                                                                                                                                            | 0.75452 | 0.79514 | 7.58      |
| O7                  | 0.37914                                                                                                                                            | 0.11548 | 0.11356 | 1.77      |
| O8                  | 0.63792                                                                                                                                            | 0.90244 | 0.85804 | 0.97      |
| O9                  | 0.45444                                                                                                                                            | 0.43081 | 0.15533 | 0.96      |
| O10                 | 0.57988                                                                                                                                            | 0.59369 | 0.81486 | -0.62     |
| O11                 | 0.07291                                                                                                                                            | 0.2451  | 0.13881 | -0.59     |
| O12                 | 0.91068                                                                                                                                            | 0.73952 | 0.83909 | 2.89      |

**Table S2** Crystal data of  $\text{Na}_3\text{Sc}_{1.935}(\text{PO}_4)_3:0.5\%\text{Cr}^{3+},6\%\text{Ga}^{3+}$  from the Rietveld refinement.

| Formula             | $\text{Na}_3\text{Sc}_2(\text{PO}_4)_3$                                                                                                              |         |         |           |
|---------------------|------------------------------------------------------------------------------------------------------------------------------------------------------|---------|---------|-----------|
| Crystal system      | Monoclinic                                                                                                                                           |         |         |           |
| Space group         | $Cc$ (9)                                                                                                                                             |         |         |           |
| Cell parameters     | $a = 15.39403(17) \text{ \AA}$ , $b = 9.09798(11) \text{ \AA}$ , $c = 8.92108(12) \text{ \AA}$<br>Alpha = 90      Beta = 90      Gamma = 123.5100(5) |         |         |           |
| Cell volume         | $V = 1041.768(25) \text{ \AA}^3$                                                                                                                     |         |         |           |
| Z                   | 4                                                                                                                                                    |         |         |           |
| Reliability factors | $R_p = 6.38\%$ , $R_{wp} = 8.97\%$ and $\chi^2 = 4.058$                                                                                              |         |         |           |
| Atom                | x/a                                                                                                                                                  | y/b     | z/c     | Ui/Ue*100 |
| Na1                 | 0.18809                                                                                                                                              | 0.54859 | 0.15213 | 2.08      |
| Na2                 | -0.00714                                                                                                                                             | 0.23281 | 0.39182 | 1.6       |
| Na3                 | 0.32559                                                                                                                                              | 0.31666 | 0.41911 | 1.05      |
| P1                  | 0.35998                                                                                                                                              | 0.26154 | 0.11203 | 0.42      |
| P2                  | 0.6455                                                                                                                                               | 0.74375 | 0.90086 | 1.08      |
| P3                  | -0.00314                                                                                                                                             | 0.24309 | 0.04272 | -0.01     |
| Sc1                 | 0.09777                                                                                                                                              | 0.04797 | 0.24648 | -0.1      |
| Sc2                 | 0.90385                                                                                                                                              | 0.95092 | 0.7548  | 0.02      |
| O1                  | 0.15404                                                                                                                                              | 0.23208 | 0.44791 | 0.73      |
| O2                  | 0.86742                                                                                                                                              | 0.79905 | 0.57658 | -0.22     |
| O3                  | 0.42643                                                                                                                                              | 0.07518 | 0.45543 | 2.73      |
| O4                  | 0.54368                                                                                                                                              | 0.91131 | 0.54575 | -0.01     |
| O5                  | 0.26301                                                                                                                                              | 0.22285 | 0.18432 | -0.32     |
| O6                  | 0.74358                                                                                                                                              | 0.7867  | 0.81998 | 0.58      |
| O7                  | 0.37525                                                                                                                                              | 0.10699 | 0.11478 | -1.15     |
| O8                  | 0.63087                                                                                                                                              | 0.89298 | 0.84591 | 1.63      |
| O9                  | 0.44186                                                                                                                                              | 0.43643 | 0.18213 | -1.38     |
| O10                 | 0.56596                                                                                                                                              | 0.58745 | 0.81881 | 1.32      |
| O11                 | 0.0756                                                                                                                                               | 0.24367 | 0.14791 | -0.61     |
| O12                 | 0.91641                                                                                                                                              | 0.75479 | 0.85905 | 0.38      |

**Table S3.** The detailed analysis of decay curves for  $\text{Na}_3\text{Sc}_2(\text{PO}_4)_3:x\%\text{Cr}^{3+}$ ,  $\text{Na}_3\text{Sc}_{1.995}(\text{PO}_4)_3:0.5\%\text{Cr}^{3+}, y\text{Ga}^{3+}$  and  $\text{Na}_3\text{Sc}_{1.935}(\text{PO}_4)_3:0.5\%\text{Cr}^{3+}, 6\%\text{Ga}^{3+}$  phosphors.

| $\text{Na}_3\text{Sc}_2(\text{PO}_4)_3:x\%\text{Cr}^{3+}$ , monitored at 694nm                             |                            |                            |        |        |                          |
|------------------------------------------------------------------------------------------------------------|----------------------------|----------------------------|--------|--------|--------------------------|
| $x$                                                                                                        | $\tau_1$ ( $\mu\text{s}$ ) | $\tau_2$ ( $\mu\text{s}$ ) | $A1$   | $A2$   | $\tau$ ( $\mu\text{s}$ ) |
| 0.5                                                                                                        | 241                        | 1705                       | 0.5574 | 0.3932 | 1460                     |
| 1                                                                                                          | 53                         | 849                        | 0.6086 | 0.2841 | 755                      |
| 2                                                                                                          | 57                         | 663                        | 0.6344 | 0.2938 | 569                      |
| 3                                                                                                          | 45                         | 623                        | 0.6654 | 0.2724 | 535                      |
| 5                                                                                                          | 16                         | 189                        | 0.6172 | 0.3460 | 166                      |
| $\text{Na}_3\text{Sc}_{1.995}(\text{PO}_4)_3:0.5\%\text{Cr}^{3+}, y\text{Ga}^{3+}$ , monitored at 694 nm   |                            |                            |        |        |                          |
| $y$                                                                                                        | $\tau_1$ ( $\mu\text{s}$ ) | $\tau_2$ ( $\mu\text{s}$ ) | $A1$   | $A2$   | $\tau$ ( $\mu\text{s}$ ) |
| 0                                                                                                          | 241                        | 1705                       | 0.5574 | 0.3932 | 1460                     |
| 0.01                                                                                                       | 61                         | 1065                       | 0.4489 | 0.2611 | 975                      |
| 0.03                                                                                                       | 17                         | 473                        | 0.6852 | 0.2021 | 424                      |
| 0.04                                                                                                       | 14                         | 216                        | 0.8181 | 0.1580 | 166                      |
| 0.06                                                                                                       | 26                         | 210                        | 0.7848 | 0.2240 | 154                      |
| 0.10                                                                                                       | 43                         | 195                        | 0.7084 | 0.2215 | 132                      |
| $\text{Na}_3\text{Sc}_{1.935}(\text{PO}_4)_3:0.5\%\text{Cr}^{3+}, 6\%\text{Ga}^{3+}$ , monitored at 750 nm |                            |                            |        |        |                          |
| $T$ ( $^\circ\text{C}$ )                                                                                   | $\tau_1$ ( $\mu\text{s}$ ) | $\tau_2$ ( $\mu\text{s}$ ) | $A1$   | $A2$   | $\tau$ ( $\mu\text{s}$ ) |
| 30                                                                                                         | 6.77                       | 69.17                      | 0.7226 | 0.2149 | 53.72                    |
| 60                                                                                                         | 6.30                       | 58.98                      | 0.7235 | 0.2310 | 45.78                    |
| 90                                                                                                         | 5.86                       | 48.48                      | 0.7196 | 0.2560 | 37.68                    |
| 120                                                                                                        | 5.26                       | 38.74                      | 0.6968 | 0.2808 | 30.29                    |
| 150                                                                                                        | 4.68                       | 30.57                      | 0.6889 | 0.3037 | 23.90                    |
| 180                                                                                                        | 3.85                       | 23.12                      | 0.6840 | 0.3261 | 18.13                    |
| 210                                                                                                        | 3.14                       | 17.97                      | 0.6928 | 0.3273 | 13.96                    |

**Table S4.** Output power and photoconversion efficiency values of NIR LEDs.

| Current (mA) | Intensity, $I_m$ (mW) | Photoconversion efficiency (%) |
|--------------|-----------------------|--------------------------------|
| 20           | 1.24                  | 2.4                            |
| 40           | 2.50                  | 2.4                            |
| 60           | 4.04                  | 2.6                            |
| 80           | 5.30                  | 2.4                            |
| 100          | 6.54                  | 2.4                            |
| 120          | 7.90                  | 2.4                            |
| 160          | 10.46                 | 2.4                            |
| 200          | 13.08                 | 2.4                            |
| 240          | 15.46                 | 2.2                            |
| 280          | 17.70                 | 2.2                            |
| 320          | 19.68                 | 2.0                            |
